# Supplementary material for: The first pan-Alpine surface-gravity database, a modern compilation that crosses frontiers
Source: Copernicus journal article supplement (doi:10.5194/essd-13-2165-2021), 2021-05-19

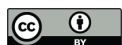

*Supplement of*

## **The first pan-Alpine surface-gravity database, a modern compilation that crosses frontiers**

**Pavol Zahorec et al.**

*Correspondence to:* Hans-Jürgen Götze ([hajo.goetze@ifg.uni-kiel.de](mailto:hajo.goetze@ifg.uni-kiel.de))

The copyright of individual parts of the supplement might differ from the article licence.

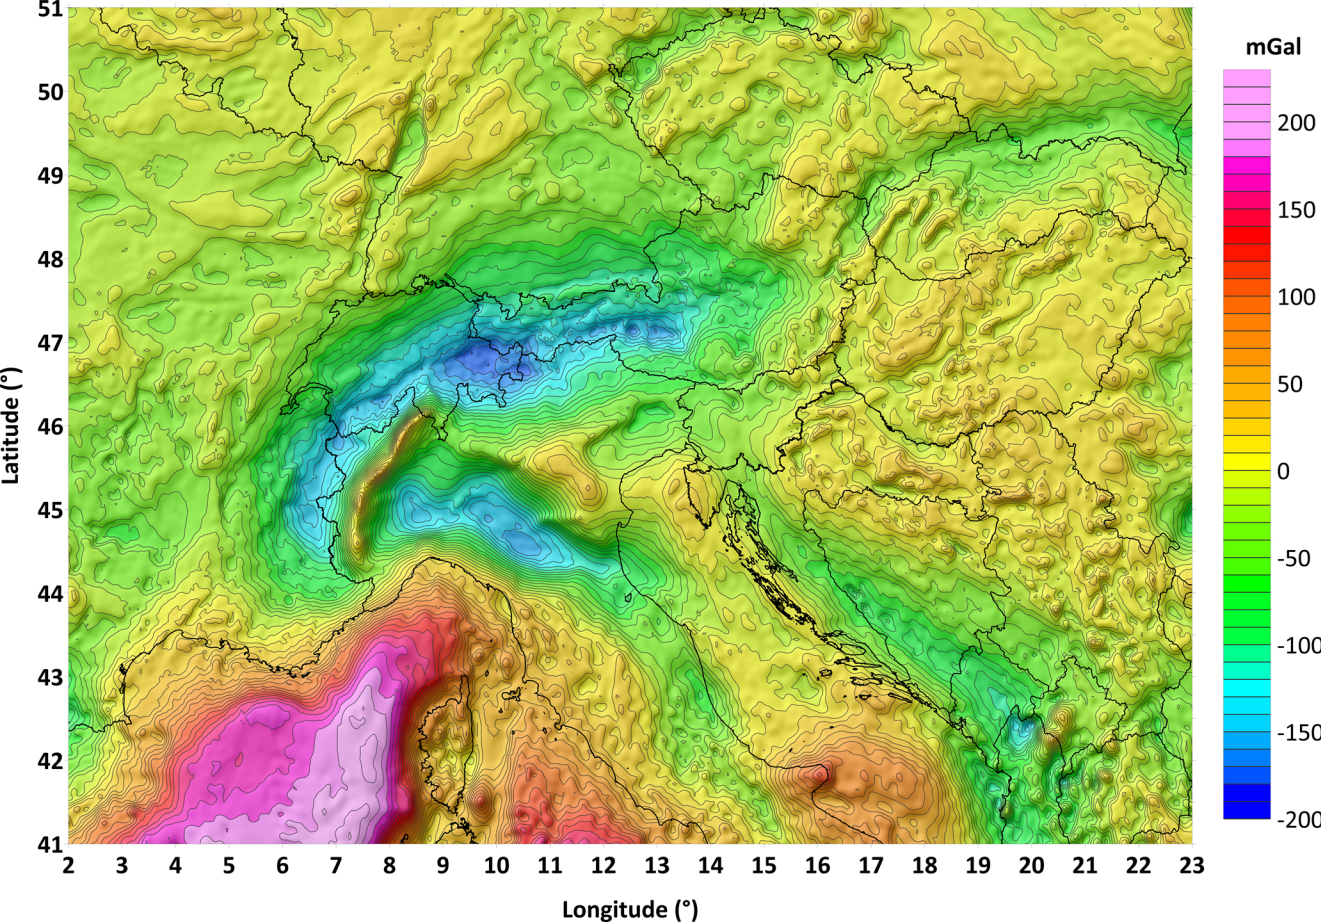

Supplement: Supplementary file 1 [file essd-13-2165-2021-supplement.pdf]
